# Supplementary material for: Role of Exosomes in Immunotherapy of Hepatocellular Carcinoma
Source: MDPI journal article supplement (doi:10.3390/cancers14164036), 2022-08-21
Supplement: s1 [file s1]

**Table S1.** Influence of exosomes on cells in tumor microenvironment of HCC

| Production cell | Exosomes                     | Affected cell                                      | Role                                                                                                                                                                   | Reference |
|-----------------|------------------------------|----------------------------------------------------|------------------------------------------------------------------------------------------------------------------------------------------------------------------------|-----------|
| HCC cells       | 14-3-3 $\zeta$ protein       | Tumor-infiltrating T lymphocytes                   | Decrease the activation and proliferation of naïve T cells and deviate the differentiation of the latter from effector T cells to Tregs                                | [30]      |
|                 | miR-15a-5p                   | CD8+ T cells                                       | Inhibit PD-1 expression and suppress the development of HCC                                                                                                            | [31]      |
|                 | PCED1B-AS1                   | Receipt T cells, macrophages and receipt HCC cells | Regulate PD-Ls expression in receipt HCC cells and inhibit receipt T cells and macrophages                                                                             | [32]      |
|                 | circGSE1                     | Tregs                                              | Facilitate HCC progression via inducing the expansion of Tregs                                                                                                         | [33]      |
|                 | HBV nucleic acids            | Macrophages                                        | Induce NKG2D expression in macrophages and further promote NK cells activation                                                                                         | [34]      |
|                 | miR-92b                      | NK cells                                           | Downregulate CD69 and NK cell-mediated cytotoxicity                                                                                                                    | [35]      |
|                 | circUHRF1                    | NK cells                                           | Inhibit NK cells function by upregulating the expression of TIM-3 via degradation of miR-449c-5p and inhibit NK cell-derived IFN- $\gamma$ and TNF- $\alpha$ secretion | [36]      |
|                 | TEXs                         | DC cells                                           | Carry HCC antigens and trigger a strong DC-mediated immune response                                                                                                    | [37]      |
|                 | TEXs                         | DC cells                                           | Activate DC cells and further promote T cells proliferation                                                                                                            | [40]      |
|                 | PD-L1                        | TAMs                                               | GOLM1 promote PD-L1 stabilization and transport PD-L1 into TAMs with exosomes, further suppress CD8+ T cells                                                           | [41]      |
|                 | miR-23a-3p                   | Macrophages                                        | Upregulate PD-L1 expression in macrophages and further inhibit T cells function                                                                                        | [42]      |
|                 | LOXL4                        | Macrophages                                        | Upregulate PD-L1 expression in macrophages                                                                                                                             | [43]      |
|                 | circTMEM181                  | Macrophages                                        | Upregulate CD39 expression in macrophages, produce more adenosine and further impair CD8+ T cells function                                                             | [44]      |
|                 | miR-99b                      | Macrophages                                        | Re-educate TAMs toward antitumor phenotype (promote M1 while suppress M2 macrophage polarization)                                                                      | [45]      |
|                 | (Low level) hsa_circ_0074854 | Macrophages                                        | Exosomes with downregulate hsa_circ_0074854 can inhibit macrophage M2 polarization                                                                                     | [49]      |
|                 | HMMR-AS1                     | Macrophages                                        | Promote the M2 polarization of macrophages                                                                                                                             | [46]      |
|                 | miR-146a-5p                  | Macrophages                                        | Promote the M2 polarization of macrophages                                                                                                                             | [47]      |
|                 | DLX6-AS1                     | Macrophages                                        | Promote the M2 polarization of macrophages                                                                                                                             | [48]      |
|                 | HMGB1                        | B cells                                            | Activate B cells and promote TIM-1+ regulatory B cells expansion                                                                                                       | [58]      |
|                 | TEXs                         | Hepatocytes                                        | Mobilize normal hepatocytes                                                                                                                                            | [70]      |

|                               |                                              |                             |                                                                                                                        |         |
|-------------------------------|----------------------------------------------|-----------------------------|------------------------------------------------------------------------------------------------------------------------|---------|
|                               | TEXs (adenylyl cyclase-associated protein 1) | HCC cells                   | Regulate the motile ability of HCC cells                                                                               | [71]    |
|                               | TEXs                                         | Vascular endothelial cells  | Promote angiogenesis                                                                                                   | [62,63] |
|                               | CXCR4                                        | Lymphatic endothelial cells | Promote lymph angiogenesis                                                                                             | [64]    |
|                               | miR-92a-3p                                   | Epithelia cells             | Promote epithelial-mesenchymal transition and metastasis                                                               | [72]    |
|                               | circ-0004277                                 | Peripheral cells            | Promote epithelial-mesenchymal transition and metastasis                                                               | [73]    |
| DC cells                      | DEXs                                         | T cells                     | Stimulate naïve T cells proliferation and induce T cells activation to become antigen-specific cytotoxic T lymphocytes | [39]    |
| Macrophages                   | miRNAs (miR-223)                             | HCC cells                   | Prevent proliferation of HCC                                                                                           | [53]    |
|                               | hsa_circ_0004658                             | HCC cells                   | Inhibit HCC progression                                                                                                | [57]    |
| M2 macrophages                | miR-660-5p                                   | HCC cells                   | Promote HCC development and epithelial-mesenchymal transition                                                          | [50]    |
|                               | miR-21-5p                                    | CD8+ T cells                | Facilitate CD8+ T cells exhaustion                                                                                     | [51]    |
|                               | miR-27a-3p                                   | HCC cells                   | Promote cancer stemness of HCC through down-regulating TXNIP                                                           | [52]    |
|                               | (Lower level) miR-125a/b                     | HCC cells                   | Promote cell proliferation and stem cell properties of HCC cell by downregulation of CD90                              | [54]    |
|                               | miR-92a-2-5p                                 | HCC cells                   | Increase the invasion capacity of HCC                                                                                  | [56]    |
| M1 macrophages                | miR-326                                      | HCC cells                   | Suppress proliferation, migration, invasion and advance apoptosis of HCC                                               | [55]    |
| Cancer-associated fibroblasts | circZFR                                      | HCC cells                   | Promote HCC development                                                                                                | [65]    |
|                               | TUG1                                         | HCC cells                   | Promote migration, invasion and glycolysis                                                                             | [66]    |
|                               | miR-29b                                      | HCC cells                   | Inhibit migration and invasion                                                                                         | [67]    |
| Adipocytes                    | miR-23a/b                                    | HCC cells                   | Promote HCC cell growth and migration                                                                                  | [68]    |
|                               | circRNAs                                     | HCC cells                   | Promote tumor growth and reduce DNA damage                                                                             | [69]    |
| Mesenchymal stem cells        | miR-127-3p                                   | Cancer stem cells           | Block malignant behaviors of HCC-sourced cancer stem cells                                                             | [74]    |
|                               | miR-15a                                      | HCC cells                   | Downregulate SALL4 expression and thereby retard HCC development                                                       | [75]    |

HCC, hepatocellular carcinoma; PD-1, programmed cell death protein 1; NK, nature killer; DC, dendritic; PD-L1, programmed cell death ligand 1; TEX, tumor cell-derived exosomes; DEXs, DC-derived exosomes; TAMs, tumor-associated macrophages; Tregs, regulatory T cells.
